# Supplementary material for: Data-Driven Modeling to Assess Receptivity for Rift Valley Fever Virus
Source: PubMed Central journal article supplement (PMC3828160; doi:10.1371/journal.pntd.0002515), 2013-11-14
Supplement: pntd.0002515.s001.pdf [file pntd.0002515.s001.pdf]

# 1 Mathematical Appendix

## 1.1 Model Description

The population of *Aedes* vectors consists of uninfected ( $P_A$ ) and infected ( $Q_A$ ) eggs, and susceptible ( $S_A$ ), incubating ( $E_A$ ; infected, but not yet infectious) and infectious ( $I_A$ ) adult individuals. The size of the adult *Aedes* mosquito population is  $N_A = S_A + E_A + I_A$ . The population of adult *Culex* vectors consists of susceptible ( $S_C$ ), incubating ( $E_C$ ) and infectious ( $I_C$ ) adult individuals. The size of adult *Culex* mosquito population is  $N_C = S_C + E_C + I_C$ . The aquatic population of *Culex* only has uninfected ( $P_C$ ) eggs because we assume there is no vertical transmission of RVFV in *Culex*. The livestock populations consist of susceptible ( $S_L$ ), incubating ( $E_L$ ), infectious ( $I_L$ ), and immune ( $R_L$ ) individuals. The total livestock population size is  $N_L = S_L + E_L + I_L + R_L$ . The other host population serves as a sink, potentially diverting mosquito bites from competent hosts, and the total population size for these sink hosts is  $N_D$ . The resulting system of the ordinary differential equations is:

Vector 1 (*A*): *Aedes* mosquitoes with vertical transmission:

$$\frac{dP_A}{dt} = \frac{b_A K_A}{N_A} (N_A - q_A I_A) - \frac{b_A K_A}{N_A} P_A \quad (1)$$

$$\frac{dQ_A}{dt} = \frac{b_A K_A}{N_A} \left( \frac{q_A}{r_{LA}} I_A - Q_A \right) \quad (2)$$

$$\frac{dS_A}{dt} = \frac{b_A K_A}{N_A} P_A - \beta_{LA} S_A \frac{I_L}{N_L} - \frac{d_A N_A}{K_A} S_A \quad (3)$$

$$\frac{dE_A}{dt} = \beta_{LA} S_A \frac{I_L}{N_L} - \frac{d_A N_A}{K_A} E_A - \varepsilon_A E_A \quad (4)$$

$$\frac{dI_A}{dt} = \frac{b_A K_A}{N_A} Q_A + \varepsilon_A E_A - \frac{d_A N_A}{K_A} I_A \quad (5)$$

$$\frac{dN_A}{dt} = \frac{b_A K_A}{N_A} (P_A + Q_A) - \frac{d_A N_A}{K_A} N_A \quad (6)$$

Vector 2 ( $C$ ): *Culex* mosquitoes:

$$\frac{dP_C}{dt} = \frac{b_C K_C}{N_C} N_C - \frac{b_C K_C}{N_C} P_C \quad (7)$$

$$\frac{dS_C}{dt} = \frac{b_C K_C}{N_C} P_C - \beta_{LC} S_C \frac{I_L}{N_L} - \frac{d_C N_C}{K_C} S_C \quad (8)$$

$$\frac{dE_C}{dt} = \beta_{LC} S_C \frac{I_C}{N_C} - \frac{d_C N_C}{K_C} E_C - \varepsilon_C E_C \quad (9)$$

$$\frac{dI_C}{dt} = \varepsilon_C E_C - \frac{d_C N_C}{K_C} I_C \quad (10)$$

$$\frac{dN_C}{dt} = \frac{b_C K_C}{N_C} P_C - \frac{d_C N_C}{K_C} N_C \quad (11)$$

Livestock host ( $L$ ):

$$\frac{dS_L}{dt} = b_L N_L - \beta_{AL} S_L \frac{I_A}{N_A} - \beta_{CL} S_L \frac{I_C}{N_C} - \frac{d_L N_L}{K_L} S_L \quad (12)$$

$$\frac{dE_L}{dt} = \beta_{AL} S_L \frac{I_A}{N_A} + \beta_{CL} S_L \frac{I_C}{N_C} - \frac{d_L N_L}{K_L} E_L - \varepsilon_L E_L \quad (13)$$

$$\frac{dI_L}{dt} = \varepsilon_L E_L - (\mu_L + \gamma_L) I_L - \frac{d_L N_L}{K_L} I_L \quad (14)$$

$$\frac{dR_L}{dt} = \gamma_L I_L - \frac{d_L N_L}{K_L} R_L \quad (15)$$

$$\frac{dN_L}{dt} = b_L N_L - \frac{d_L N_L^2}{K_L} - \mu_L I_L \quad (16)$$

Dead-end host ( $D$ ):

$$\frac{dN_D}{dt} = b_D N_D - \frac{d_D N_D^2}{K_D} \quad (17)$$

**Table S1. Definitions for model parameters.**

| Symbol | Description                                | Definition                                                                         | Reference |
|--------|--------------------------------------------|------------------------------------------------------------------------------------|-----------|
| $b_A$  | Birth rate of <i>Aedes</i> vectors         | $= d_A$                                                                            |           |
| $b_C$  | Birth rate of <i>Culex</i> vectors         | $= d_C$                                                                            |           |
| $b_L$  | Birth rate of livestock                    | $= d_L$                                                                            |           |
| $b_D$  | Birth rate of dead-end hosts               | $= d_D$                                                                            |           |
| $K_A$  | Carrying capacity for <i>Aedes</i> vectors | $(\frac{Aedes\ females}{CO_2\ trap-night})_{time+1} \times GPA \times (N_L + N_D)$ |           |

|              |                                                                     |                                                                                     |                       |
|--------------|---------------------------------------------------------------------|-------------------------------------------------------------------------------------|-----------------------|
| $K_C$        | Carrying capacity for <i>Culex</i> vectors                          | $(\frac{Culex\ females}{CO_2\ trap-night})_{time+1} \times GP_C \times (N_L + N_D)$ |                       |
| $K_L$        | Carrying capacity for livestock                                     | $= N_L$ (from data)                                                                 | (see text & Table S2) |
| $K_D$        | Carrying capacity for dead-end hosts                                | $= N_D$ (from data)                                                                 | (see text & Table S2) |
| $1/d_A$      | Life span of <i>Aedes</i> vectors                                   | 10 days                                                                             | [1]                   |
| $1/d_C$      | Life span of <i>Culex</i> vectors                                   | 10 days                                                                             | [2, 3]                |
| $1/d_L$      | Life span of livestock                                              | 5 years                                                                             |                       |
| $1/d_D$      | Life span of dead-end hosts                                         | 1 year                                                                              | [4, 5]                |
| $q_A$        | Probability of vertical transmission                                | 0.001                                                                               | [6, 7]                |
| $\beta_{LA}$ | Transmission rate from livestock to <i>Aedes</i>                    | $\frac{r_{LA}}{GP_A} \times f_L$                                                    |                       |
| $\beta_{LC}$ | Transmission rate from livestock to <i>Culex</i>                    | $\frac{r_{LC}}{GP_C} \times f_L$                                                    |                       |
| $\beta_{AL}$ | Transmission rate from <i>Aedes</i> to livestock                    | $\beta_{LA} \frac{N_A}{N_L}$                                                        |                       |
| $\beta_{CL}$ | Transmission rate from <i>Culex</i> to livestock                    | $\beta_{LC} \frac{N_C}{N_L}$                                                        |                       |
| $r_{LA}$     | Probability of transmission from livestock to <i>Aedes</i> per bite | 0.005                                                                               | [8]                   |
| $r_{LC}$     | Probability of transmission from livestock to <i>Culex</i> per bite | 0.09                                                                                | [8]                   |
| $GP_A$       | Gonotrophic period for <i>Aedes</i> in days                         | $2 + (-0.066 + 0.018T)^{-1}$                                                        | [9]                   |
| $GP_C$       | Gonotrophic period for <i>Culex</i> in days                         | $2 + (-0.066 + 0.018T)^{-1}$                                                        | [9]                   |

|                   |                                                     |                                            |                           |
|-------------------|-----------------------------------------------------|--------------------------------------------|---------------------------|
| $f_L$             | Probability of mosquito feeding on livestock        | $\frac{N_L}{N_L + N_D}$                    |                           |
| $1/\varepsilon_A$ | Extrinsic incubation period of RVFV in <i>Aedes</i> | $(-0.1038 + 0.0071T)^{-1}$                 | [10, 11]; but see methods |
| $1/\varepsilon_C$ | Extrinsic incubation period of RVFV in <i>Culex</i> | $(-0.1038 + 0.0071T)^{-1}$                 | [10, 11]; but see methods |
| $1/\varepsilon_L$ | Intrinsic incubation period of RVFV in livestock    | 1 day                                      | [12]                      |
| $T$               | Temperature (°C)                                    | 10-year mean daily temperatures, 2002–2011 | TOPS [13]                 |
| $1/\gamma_L$      | Infectious period of livestock                      | 4 days                                     | [14]                      |
| $1/\mu_L$         | Excess disease-related mortality of livestock       | $-\log(1 - 0.25) \times \gamma_L$          | [14]                      |

**Table S2. Data-based definitions for state variables for each grid cell.<sup>a</sup>**

| Symbol | Description                    | Definition                                                                                  | Source                                                                                                                                  |
|--------|--------------------------------|---------------------------------------------------------------------------------------------|-----------------------------------------------------------------------------------------------------------------------------------------|
| $N_A$  | Number of <i>Aedes</i> vectors | $\left(\frac{Aedes\ females}{CO_2\ trap-night}\right)_{time} \times GPA \times (N_L + N_D)$ | CO <sub>2</sub> trap records from mosquito control agencies linked to land use classes defined in the National Land Cover Data Set 2006 |
| $N_C$  | Number of <i>Culex</i> vectors | $\left(\frac{Culex\ females}{CO_2\ trap-night}\right)_{time} \times GPC \times (N_L + N_D)$ | CO <sub>2</sub> trap records from mosquito control agencies linked to land use classes defined in the National Land Cover Data Set 2006 |
| $N_L$  | Number of livestock            | Direct tabulation from spatial data                                                         | California Water Resources Control Board                                                                                                |
| $N_D$  | Number of dead-end hosts       | $\left(\frac{Birds}{Survey\ route}\right) \times \left(\frac{25}{50\pi 0.2}\right)$         | USGS Breeding Bird Survey                                                                                                               |

<sup>a</sup> See the methods section for further explanation.

## 1.2 Computation of $\mathcal{R}_0$

$\mathcal{R}_0$  is computed according to the next-generation matrices method described by van den Driessche and Watmough [15], and the details are summarized here for completeness. For vertical transmission, the next-generation matrices ( $F_V$  and  $V_V$ ) are as below:

$$F_V = \begin{bmatrix} 0 & \frac{b_A K_A}{N_A} \frac{q_A}{r_{LA}} \\ 0 & 0 \end{bmatrix} \quad (18)$$

$$V_V = \begin{bmatrix} \frac{b_A K_A}{N_A} & 0 \\ -\frac{b_A K_A}{N_A} & \frac{d_A N_A}{K_A} \end{bmatrix} \quad (19)$$

Let  $x_j = \frac{X_j}{N_j}$ ,  $j = A, C, L$  and  $X = S, E, I, K$ . Then the next-generation matrices of the horizontal transmission ( $F_H$  and  $V_H$ ) are:

$$F_H = \begin{bmatrix} 0 & 0 & 0 & \beta_{LASA} & 0 & 0 \\ 0 & 0 & 0 & 0 & 0 & 0 \\ 0 & \beta_{ALS_L} & 0 & 0 & 0 & \beta_{CLS_L} \\ 0 & 0 & 0 & 0 & 0 & 0 \\ 0 & 0 & 0 & \beta_{LCS_C} & 0 & 0 \\ 0 & 0 & 0 & 0 & 0 & 0 \end{bmatrix} \quad (20)$$

$$V_H = \begin{bmatrix} d_A/k_A + \varepsilon_A & 0 & 0 & \beta_{LASA} & 0 & 0 \\ -\varepsilon_A & d_A/k_A & 0 & 0 & 0 & 0 \\ 0 & 0 & d_L/k_L + \varepsilon_L & 0 & 0 & 0 \\ 0 & 0 & -\varepsilon_L & d_L/k_L + \mu_L + \gamma_L & 0 & 0 \\ 0 & 0 & 0 & 0 & d_C/k_C + \varepsilon_C & 0 \\ 0 & 0 & 0 & 0 & -\varepsilon_C & d_C/k_C \end{bmatrix} \quad (21)$$

$\mathcal{R}_0$  can be calculated as:

$$\mathcal{R}_0 = \rho(F_V V_V^{-1}) + \rho(F_H V_H^{-1}), \quad (22)$$

where  $\rho(\text{matrix})$  represents the maximum eigenvalue of the matrix.

At disease-free equilibrium (DFE),  $s_A = 1, s_C = 1, s_L = 1$ . And  $k_A = \frac{K_A}{N_A}, k_C = \frac{K_C}{N_C}, k_L = \frac{K_L}{N_L}$  were computed from vector and livestock data as in Tables S1 and S2.

### 1.3 Computation of $\mathcal{E}_0$

$\mathcal{E}_0$  was computed according to the method described by Hosack et al. [16].  $\mathcal{E}_0$  was generated from the Hermitian parts of the next-generation matrices used for the  $\mathcal{R}_0$  computation as follows:

$$\begin{aligned} \mathcal{E}_0 &= \rho(H(F_V)H(V_V)^{-1}) + \rho(H(F_H)H(V_H)^{-1}) \\ &= \rho\left(\frac{F_V + F_V^t}{2} \cdot \left(\frac{V_V + V_V^t}{2}\right)^{-1}\right) + \rho\left(\frac{F_H + F_H^t}{2} \cdot \left(\frac{V_H + V_H^t}{2}\right)^{-1}\right), \end{aligned} \quad (23)$$

where  $\rho(\text{matrix})$  represents the maximum eigenvalue of the matrix.

At the disease-free equilibrium (DFE),  $s_A = 1, s_C = 1, s_L = 1$ . And  $k_A = \frac{K_A}{N_A}, k_C = \frac{K_C}{N_C}, k_L = \frac{K_L}{N_L}$  were computed from vector and livestock data as in Tables S1 and S2.

### 1.4 Sensitivity analysis for $\mathcal{R}_0$ and $\mathcal{E}_0$

The following Table S3 shows the detailed results of the sensitivity analysis.

**Table S3.** Ranges of parameters and their partial rank correlation coefficient (PRCC) and  $p$ -values in relation to  $\mathcal{R}_0$  and  $\mathcal{E}_0$ .

| Symbol                                                                                             | Range                                                  | To $\mathcal{R}_0$ |             | To $\mathcal{E}_0$ |             |
|----------------------------------------------------------------------------------------------------|--------------------------------------------------------|--------------------|-------------|--------------------|-------------|
|                                                                                                    |                                                        | PRCC               | $p$ -value  | PRCC               | $p$ -value  |
| $d_A(= b_A)$                                                                                       | $[\frac{1}{21}, \frac{1}{7}]$                          | -4.7826            | < 0.0001*** | -3.4486            | 0.0007**    |
| $d_C(= b_C)$                                                                                       | $[\frac{1}{21}, \frac{1}{7}]$                          | -1.2888            | 0.1990      | -3.7628            | 0.0002**    |
| $d_L(= b_L)$                                                                                       | $[\frac{1}{10 \times 365}, \frac{1}{1 \times 365}]$    | 0.3857             | 0.7002      | -0.1829            | 0.8550      |
| $d_D(= b_D)$                                                                                       | $[\frac{1}{3.0 \times 365}, \frac{1}{0.5 \times 365}]$ | 1.0375             | 0.3007      | 1.3555             | 0.1768      |
| $N_A$                                                                                              | (0, 1000]                                              | -5.1767            | < 0.0001*** | 5.8943             | < 0.0001*** |
| $K_A$                                                                                              | (0, 1000]                                              | 8.4685             | < 0.0001*** | 6.9289             | < 0.0001*** |
| $N_C$                                                                                              | (0, 1000]                                              | -5.5447            | < 0.0001*** | 7.3618             | < 0.0001*** |
| $K_C$                                                                                              | (0, 1000]                                              | 5.1922             | < 0.0001*** | 6.8351             | < 0.0001*** |
| $N_L(= K_L)$                                                                                       | [144, 25130]                                           | -0.6223            | 0.5345      | -0.6508            | 0.5160      |
| $N_D(= K_D)$                                                                                       | [21, 262]                                              | -1.0991            | 0.2731      | -0.7998            | 0.4248      |
| $q_A$                                                                                              | [0.001, 0.008]                                         | 0.2612             | 0.7942      | 1.3173             | 0.1893      |
| $r_{LA}$                                                                                           | [0.001, 0.70]                                          | 8.7827             | < 0.0001*** | 11.9349            | < 0.0001*** |
| $r_{LC}$                                                                                           | [0.001, 0.70]                                          | 6.8898             | < 0.0001*** | 11.9748            | < 0.0001*** |
| $\varepsilon_L$                                                                                    | $[\frac{1}{6}, 1]$                                     | -0.8097            | 0.4191      | -7.5587            | < 0.0001*** |
| $\gamma_L$                                                                                         | $[\frac{1}{5}, 1]$                                     | -4.0321            | 0.0001**    | -3.6577            | 0.0003**    |
| $\mu_L$                                                                                            | [0.025, 0.1]                                           | -0.9156            | 0.3610      | -0.2306            | 0.8179      |
| $T$                                                                                                | [6.97°C, 31.79°C]                                      | 16.2418            | < 0.0001*** | 2.6719             | 0.0082*     |
| *: significant at 0.01 level<br>**: significant at 0.001 level<br>***: significant at 0.0001 level |                                                        |                    |             |                    |             |

## References

1. Jensen T, Washino R (1991) An assessment of the biological capacity of a Sacramento Valley population of *Aedes melanimon* to vector arboviruses. American Journal of Tropical Medicine and Hygiene 44: 355–363.
2. Reisen WK, Reeves WC (1990) Bionomics and ecology of *Culex tarsalis* and other potential mosquito vector species. In: Epidemiology and Control of Mosquito-borne Arboviruses in California, 1943–1987, Sacramento, CA: California Mosquito and Vector Control Assoc., volume 1. pp. 254–329.

3. Reisen W, Milby M, Reeves W, Meyer R, Bock M (1983) Population ecology of *Culex tarsalis* (Diptera: Culicidae) in a foothill environment of Kern County, California: temporal changes in female relative abundance, reproductive status, and survivorship. *Annals of the Entomological Society of America* 76: 800–808.
4. Fankhauser D (1971) Annual adult survival rates of blackbirds and starlings. *Bird-Banding* 42: 36–42.
5. Searcy W, Yasukawa K (1981) Sexual size dimorphism and survival of male and female blackbirds (Icteridae). *The Auk* : 457–465.
6. Linthicum K, Davies F, Kairo A, Bailey C, et al. (1985) Rift Valley fever virus (family Bunyaviridae, genus *Phlebovirus*). Isolations from Diptera collected during an inter-epizootic period in Kenya. *Journal of Hygiene (London)* 95: 197–209.
7. Turell M, Linthicum K, Patrican L, Davies F, Kairo A, et al. (2008) Vector competence of selected African mosquito (Diptera: Culicidae) species for Rift Valley fever virus. *Journal of Medical Entomology* 45: 102–108.
8. Turell M, Wilson W, Bennett K (2010) Potential for North American mosquitoes (Diptera: Culicidae) to transmit Rift Valley fever virus. *Journal of Medical Entomology* 47: 884–889.
9. Reisen W, Milby M, Presser S, Hardy J (1992) Ecology of mosquitoes and St. Louis encephalitis virus in the Los Angeles basin of California, 1987–1990. *Journal of Medical Entomology* 29: 582–598.
10. Turell M, Rossi C, Bailey C (1985) Effect of extrinsic incubation temperature on the ability of *Aedes taeniorhynchus* and *Culex pipiens* to transmit Rift Valley fever virus. *American Journal of Tropical Medicine and Hygiene* 34: 1211–1218.
11. Turell M (1989) Effect of environmental temperature on the vector competence of *Aedes fowleri* for Rift Valley fever virus. *Research in Virology* 140: 147–154.
12. Nfon CK, Marszal P, Zhang S, Weingartl HM (2012) Innate immune response to Rift Valley fever virus in goats. *PLoS Negl Trop Dis* 6: e1623.



13. Nemani R, Votava P, Michaelis A, White M, Melton F, et al. (2007) Remote sensing methodologies for ecosystem management. In: Aswathanarayana U, editor, Food & Water Security, Oxford, UK: Taylor & Francis. pp. 1-19.
14. Erasmus B, Coetzer J (1981) The symptomatology and pathology of Rift Valley fever in domestic animals. *Contributions to Epidemiology and Biostatistics* 3: 77–82.
15. van den Driessche P, Watmough J (2002) Reproduction numbers and sub-threshold endemic equilibria for compartmental models of disease transmission. *Mathematical Biosciences* 180: 29 - 48.
16. Hosack GR, Rossignol PA, van den Driessche P (2008) The control of vector-borne disease epidemics. *Journal of Theoretical Biology* 255: 16–25.
